# Supplementary figures and images for: Characterization and Comparative Genomic Analysis of Yersinia enterocolitica strains Isolated from Poultry and Red Meat in South Korea
Source: Research Square preprint supplement (doi:10.21203/rs.3.rs-8676138/v1), 2026-01-28

Figure 2

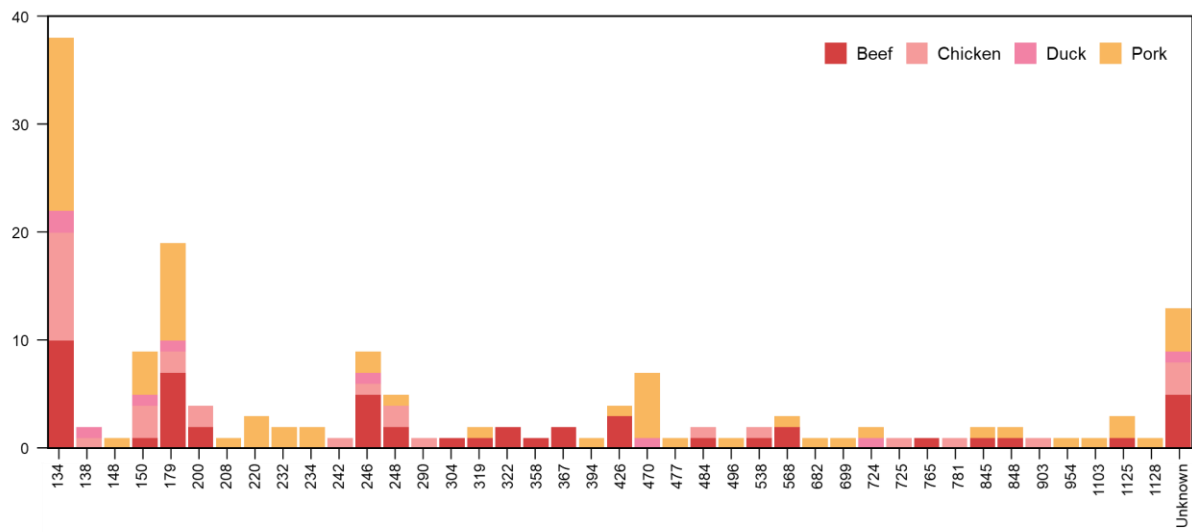

Supplement: Supplementary file 1 [file bc045cde337e0ecfbda08d21.pdf]
